# Supplementary material
Source: publisher figshare collection journal article supplement (https://tandf.figshare.com/ndownloader/files/14133491)
Supplement: Supplementary file 1 [file 14133491]

**中文版 BMQ 用于哮喘患者 ICS 服药信念调查**

1. 我当前的健康状况依赖于使用吸入性糖皮质激素

☐ 非常不同意 ☐ 不同意 ☐ 不确定 ☐ 同意 ☐ 非常同意

1. 我很担忧必须要使用吸入性糖皮质激素

☐ 非常不同意 ☐ 不同意 ☐ 不确定 ☐ 同意 ☐ 非常同意

1. 如果没有吸入性糖皮质激素，我就没有正常的生活

☐ 非常不同意 ☐ 不同意 ☐ 不确定 ☐ 同意 ☐ 非常同意

1. 如果没有吸入性糖皮质激素，我的病情会很严重

☐ 非常不同意 ☐ 不同意 ☐ 不确定 ☐ 同意 ☐ 非常同意

1. 我有时候会担心长期使用吸入性糖皮质激素会带来不良反应

☐ 非常不同意 ☐ 不同意 ☐ 不确定 ☐ 同意 ☐ 非常同意

1. 吸入性糖皮质激素对我来说是个谜

☐ 非常不同意 ☐ 不同意 ☐ 不确定 ☐ 同意 ☐ 非常同意

1. 吸入性糖皮质激素扰乱了我的生活

☐ 非常不同意 ☐ 不同意 ☐ 不确定 ☐ 同意 ☐ 非常同意

1. 我有时候会担心自己过分的依赖使用吸入性糖皮质激素

☐ 非常不同意 ☐ 不同意 ☐ 不确定 ☐ 同意 ☐ 非常同意

1. 我今后的健康状况将要继续依赖吸入性糖皮质激素

☐ 非常不同意 ☐ 不同意 ☐ 不确定 ☐ 同意 ☐ 非常同意

1. 吸入性糖皮质激素可以防止哮喘恶化

☐ 非常不同意 ☐ 不同意 ☐ 不确定 ☐ 同意 ☐ 非常同意
